# Supplementary material for: Biosensing Chlorpyrifos in Environmental Water Samples by a Newly Developed Carbon Nanoparticle-Based Indirect Lateral Flow Assay
Source: MDPI journal article supplement (doi:10.3390/bios12090735), 2022-09-07
Supplement: s1 [file s1]

## Tables

**Table S1.** Collected surface water samples.

| Sample No. | Code | Country of origin | Sample location                | Sampling date |
|------------|------|-------------------|--------------------------------|---------------|
| 1          | BP   | Belgium           | Botanic garden pond, Brussel   | 2019/12/30    |
| 2          | OR   | the Netherlands   | Rhine river, Oosterbeek        | 2019/12/28    |
| 3          | PS   | France            | Seine river, Paris             | 2019/12/23    |
| 4          | RH   | the Netherlands   | Leuvehaven harbour, Rotterdam  | 2019/12/28    |
| 5          | WP   | the Netherlands   | Campus pond, Wageningen        | 2022/04/15    |
| 6          | WB   | the Netherlands   | Agricultural brook, Wageningen | 2022/04/15    |
| 7          | RA   | Italy             | Aquaponics farm, Rome          | 2021/04/12    |
| 8          | WT   | the Netherlands   | Tap water, Wageningen          | 2022/04/15    |

**Table S2.** Average relative LFIA readings of all the fortified water samples LFIAs.

| Sample <sup>1</sup> | 200 ppb <sup>2</sup> |                      | 20 ppb |         | 2 ppb |         | 0 ppb |         |
|---------------------|----------------------|----------------------|--------|---------|-------|---------|-------|---------|
|                     | Mean                 | St.dev. <sup>3</sup> | Mean   | St.dev. | Mean  | St.dev. | Mean  | St.dev. |
| BP                  | 0.110                | 0.035                | 0.656  | 0.045   | 1.431 | 0.124   | 2.346 | 0.025   |
| OR                  | 0.122                | 0.026                | 0.552  | 0.021   | 1.437 | 0.139   | 2.146 | 0.247   |
| PS                  | 0.145                | 0.031                | 0.350  | 0.023   | 1.764 | 0.014   | 2.051 | 0.181   |
| RH                  | 0.140                | 0.015                | 0.629  | 0.052   | 1.433 | 0.015   | 2.621 | 0.363   |
| WB                  | 0.083                | 0.005                | 0.374  | 0.002   | 1.267 | 0.012   | 1.866 | 0.045   |
| WP                  | 0.173                | 0.098                | 0.428  | 0.005   | 1.615 | 0.064   | 1.959 | 0.201   |
| RA                  | 0.135                | 0.034                | 0.370  | 0.033   | 1.339 | 0.090   | 2.437 | 0.130   |
| WT                  | 0.263                | 0.064                | 0.493  | 0.001   | 1.402 | 0.008   | 2.392 | 0.005   |

<sup>1</sup> BP = Pond Brussels, OR = Rhine Oosterbeek, PS = Seine Paris, RH = Harbour Rotterdam, WB = Brook Wageningen, WP = Pond Wageningen, RA = aquaponics water, Rome and WT = tap water, Wageningen. <sup>2</sup> ppb = parts per billion (µg/L). <sup>3</sup> St.dev. is standard deviation (n=2).

## Figures

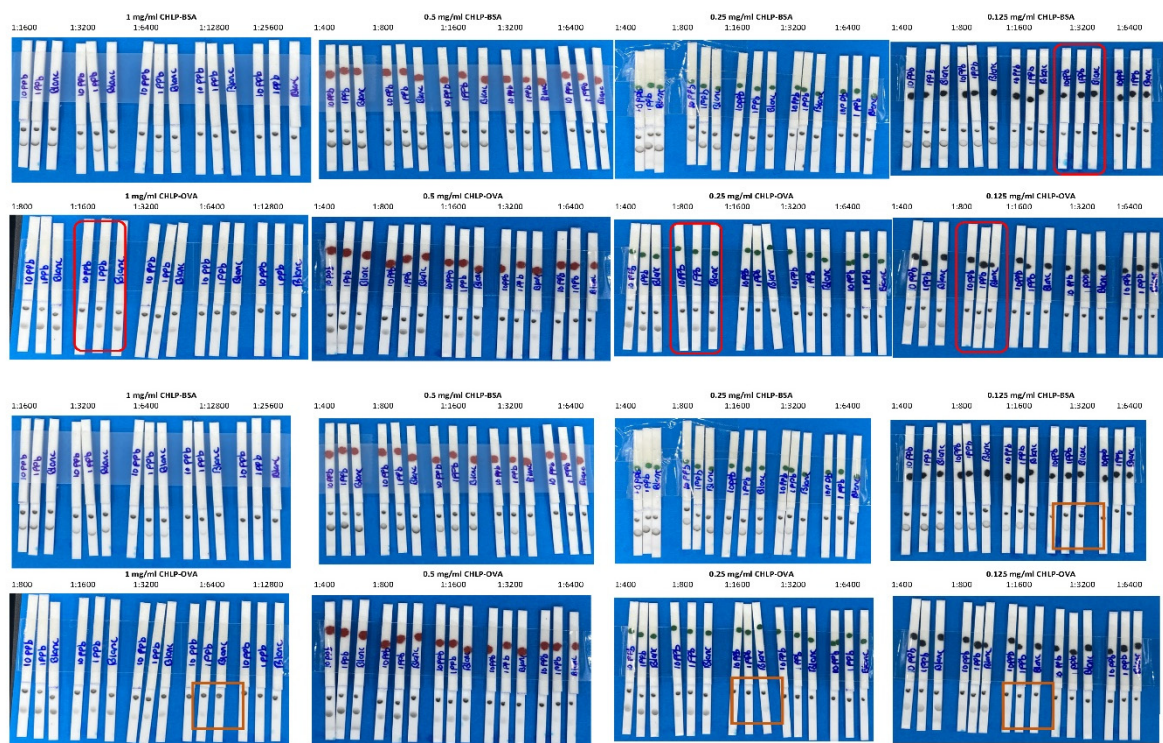

**Figure S1.** Method setup by the implementation of spot-based strips with constant concentrations of DAG pAb for the control spot (upper) and varying concentrations of CHLP-protein conjugates for the test spot (lower) on the membrane combined with serial CHLP-mAb dilutions.

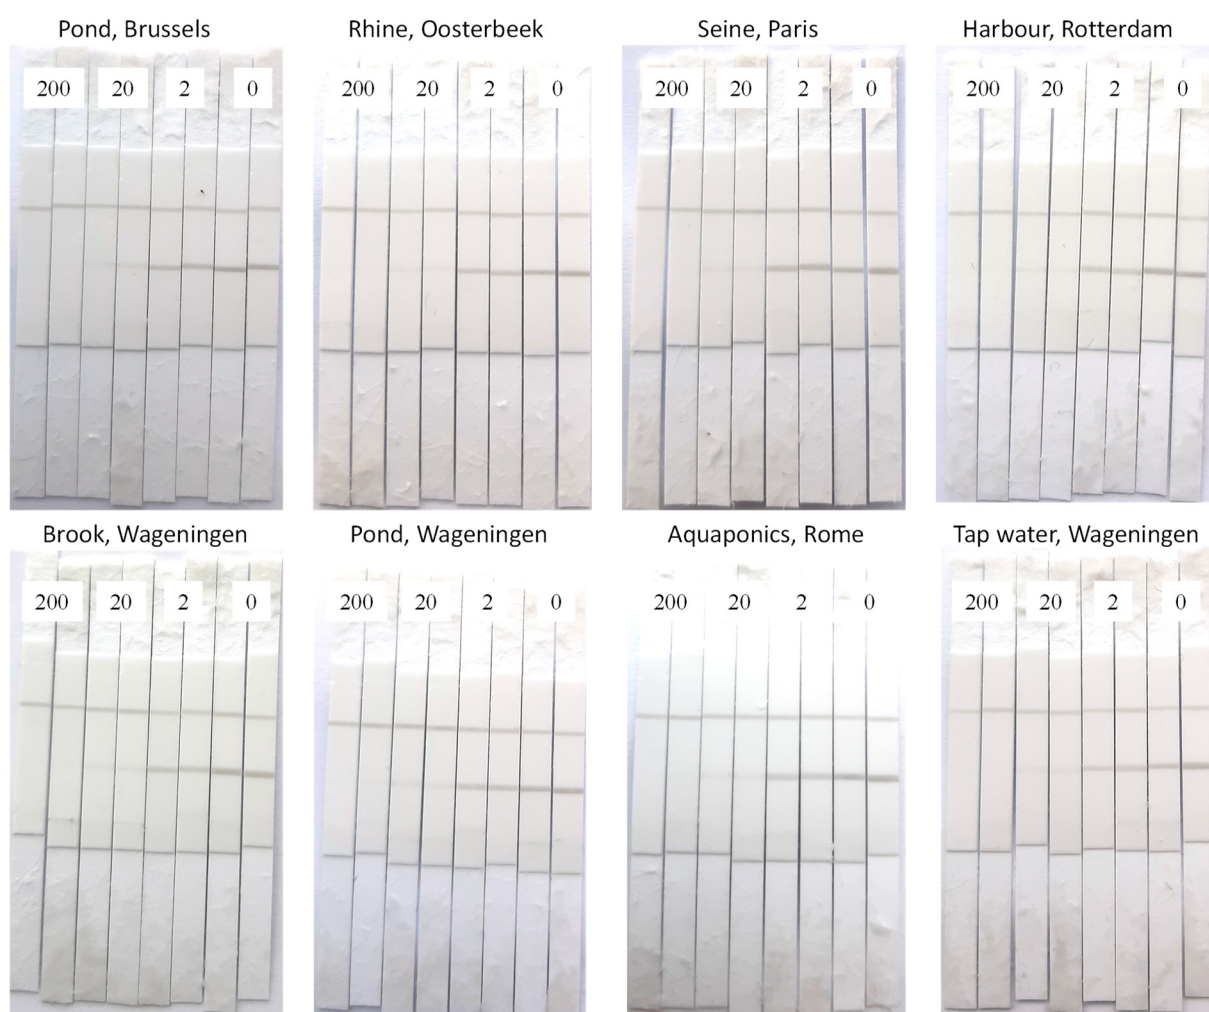

**Figure S2.** Overview of LFIA results for all the assessed environmental water samples. Each concentration ( $\mu\text{g/mL}$ ) was tested in duplicate. .

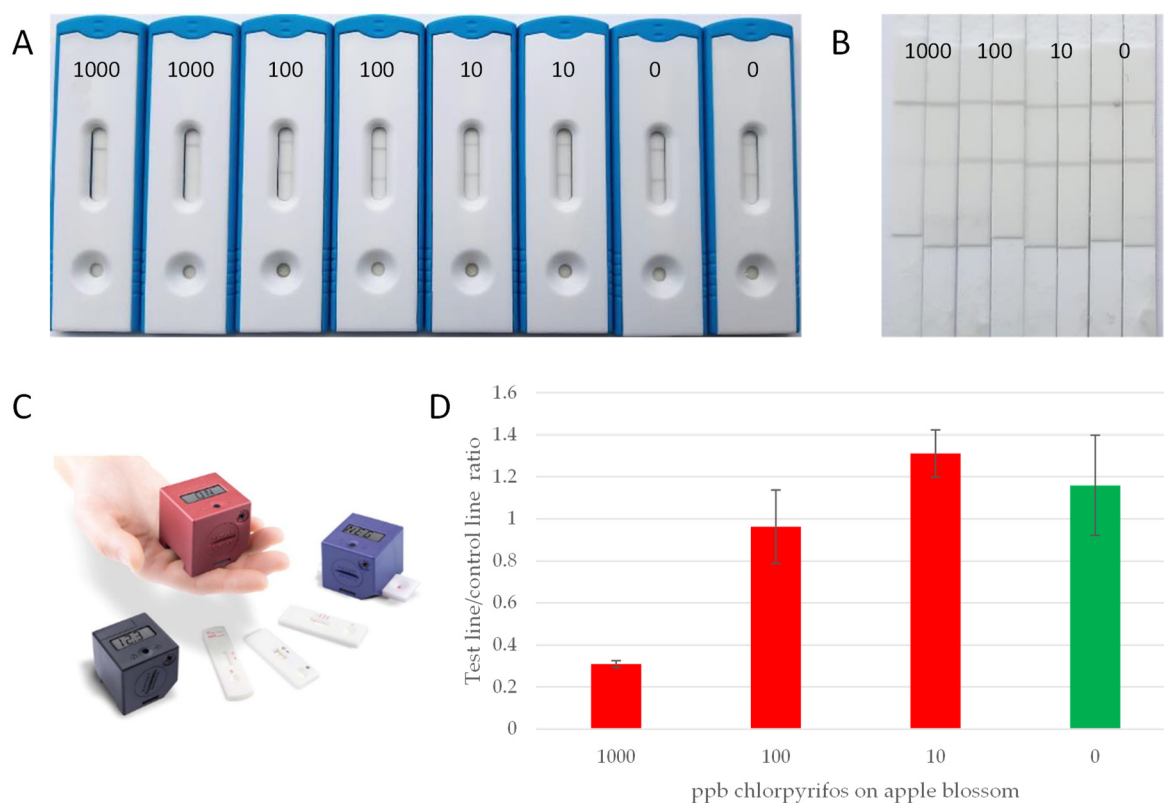

**Figure S3.** LFIA detection of chlorpyrifos in ppb ( $=\mu\text{g/mL}$ ) (applied and dried) on apple blossom after water extractions by visual (A, B) readout and using a cube digital imager (C), for duplicate readings (D). The test line signals are divided by the control line signals to acquire T/C ratios.

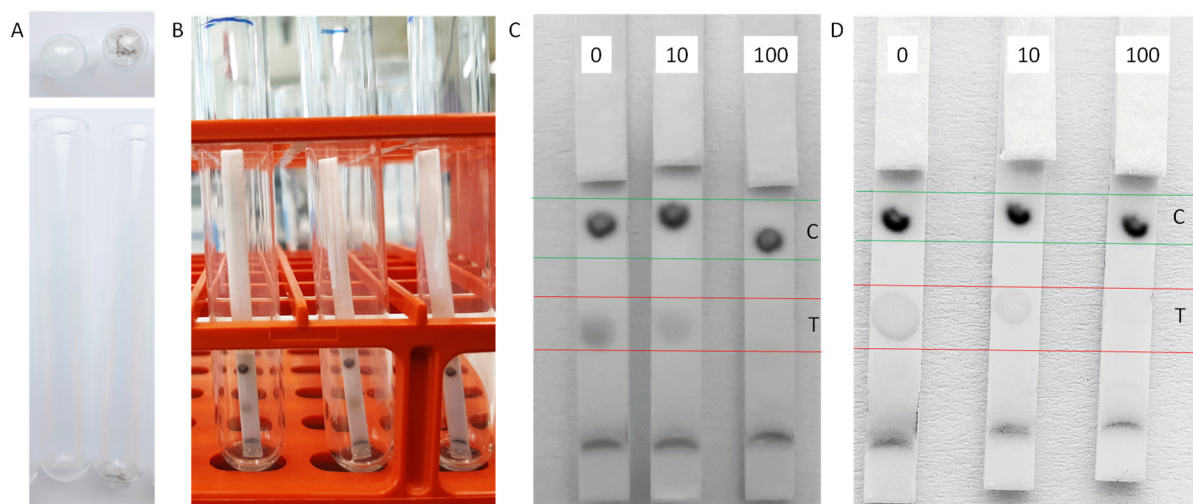

**Figure S4.** Simplification of the LFIA by drying assay reagents and buffer in tubes (A), after which a water sample containing chlorpyrifos is added and the LFIA inserted (B), showing  $10\ \mu\text{g/mL}$  sensitivities for spot-based LFIA in duplicate measurements after visual readout (C, D). See the main body of the text for more explanation.
